# Supplementary material for: Transcriptome sequencing of Eucalyptus camaldulensis seedlings subjected to water stress reveals functional single nucleotide polymorphisms and genes under selection
Source: PubMed Central journal article supplement (PMC3472208; doi:10.1186/1471-2164-13-364), 2012-08-01

# Supplementary Figure S1

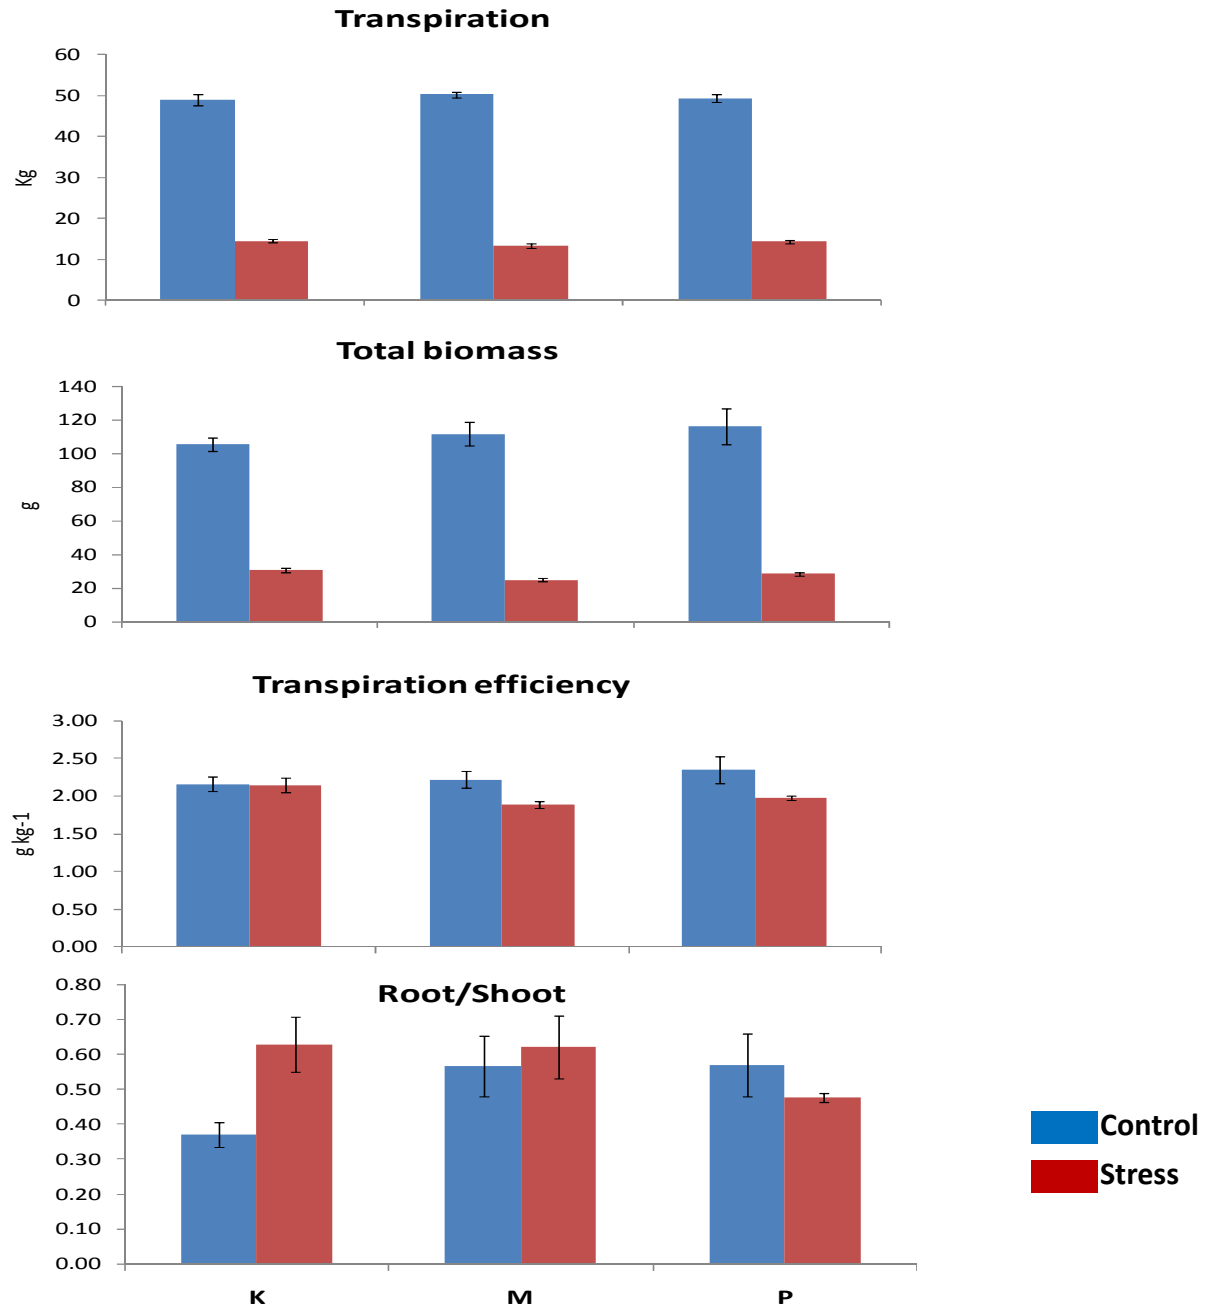

Supplement: 1471-2164-13-364-S1.pdf [file 1471-2164-13-364-S1.pdf]
